# Supplementary material for: Thermoelectric properties of two-dimensional selenene and tellurene from group-VI elements
Source: Royal Society of Chemistry journal article supplement (doi:10.1039/c8cp04069a), 2018-01-01
Supplement: c8cp04069a1.pdf [file c8cp04069a1.pdf]

## Thermoelectric Properties of Two-Dimensional Selenene and Tellurene from Group-VI Elements

Chensheng Lin,<sup>a</sup> Wendan Cheng,<sup>a</sup> Guoliang Chai,<sup>\*a</sup> and Hao Zhang<sup>a</sup>

<sup>a</sup>State Key Laboratory of Structural Chemistry, Fujian Institute of Research on the Structure of Matter, Chinese Academy of Sciences, Fuzhou 350002, China.

### 1. PBE-SOC and HSE band structures:

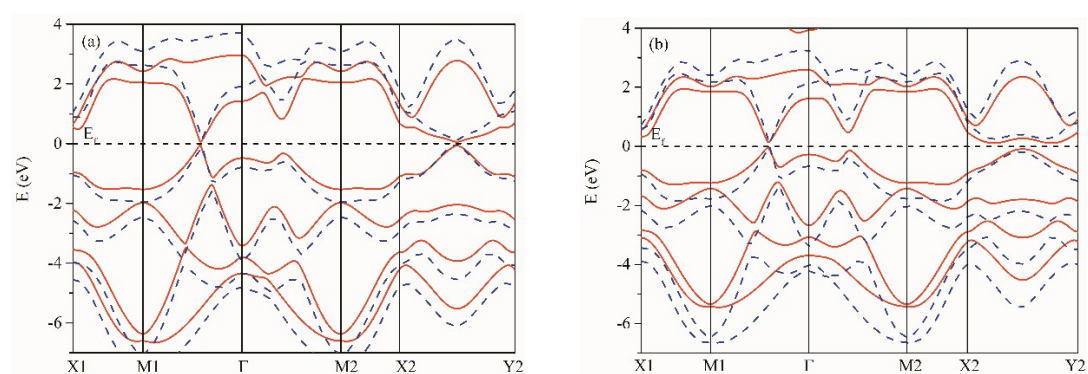

**Figure S1.** Electronic band structure calculated with PBE-SOC (red line) and HSE (dash blue line) for (a) selenene and (b) tellurene.

### 2. Effective mass fitting

The effective mass  $m^*$  is given as

$$m^* = \left( \frac{1}{\hbar^2} \frac{d^2E}{dk^2} \right)^{-1}$$

Where  $\hbar$  is reduce Planck constant,  $E$  is band energy, and  $k$  is reciprocal k-space.

The parabolic fitting range is shown in **Figure S1** and the fitting parameter is given in **Table S1**.

**TABLE S1.** Parabolic fitting B2 parameters (equation:  $y = \text{intercept} + B1 \cdot X + B2 \cdot X^2$ , energy: eV, length: Å) for the effective mass calculated by PBE-SOC and HSE (in parenthesis) method for selenene and tellurene

| 2D material | Band       | zigzag           | Armchair       |
|-------------|------------|------------------|----------------|
| Selenene    | conduction | 6742<br>(6777)   | 575<br>(684)   |
|             | Valance    | -7569<br>(-9227) | -816<br>(-798) |
| Tellurene   | conduction | 2124<br>(2707)   | 178<br>(188)   |
|             | Valance    | -5835<br>(-7554) | -349<br>(-368) |

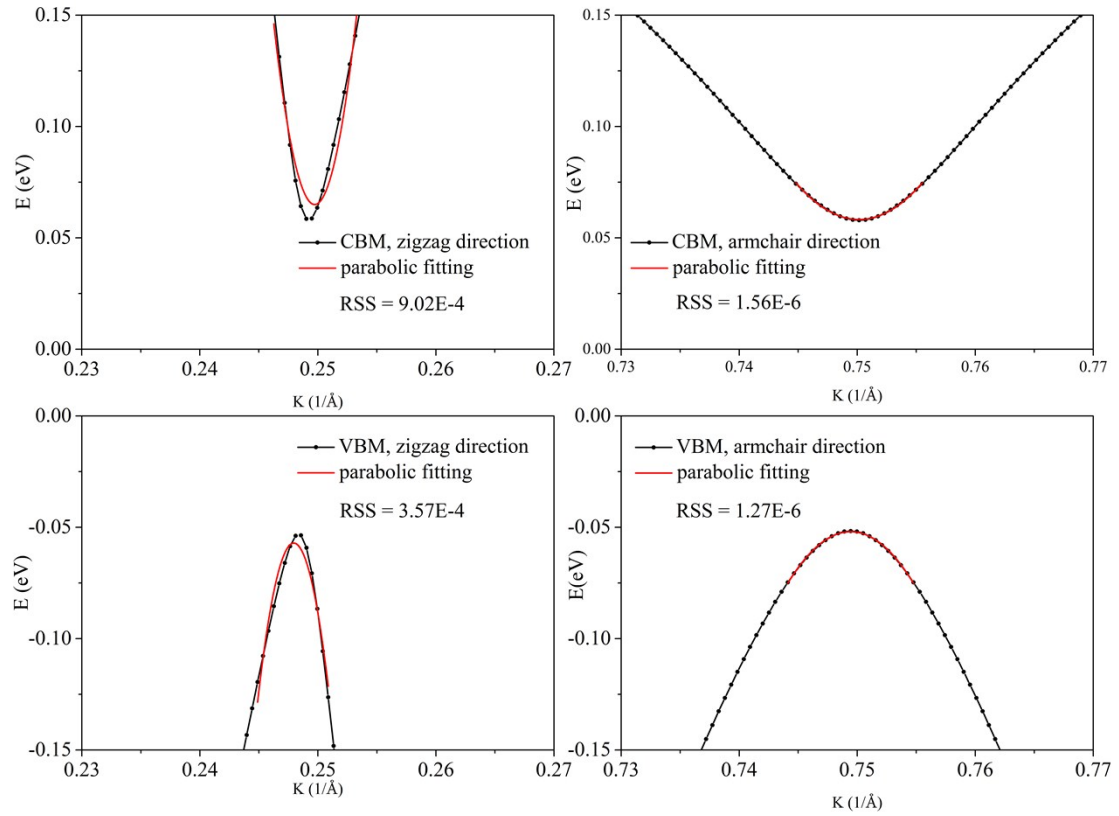

(a)

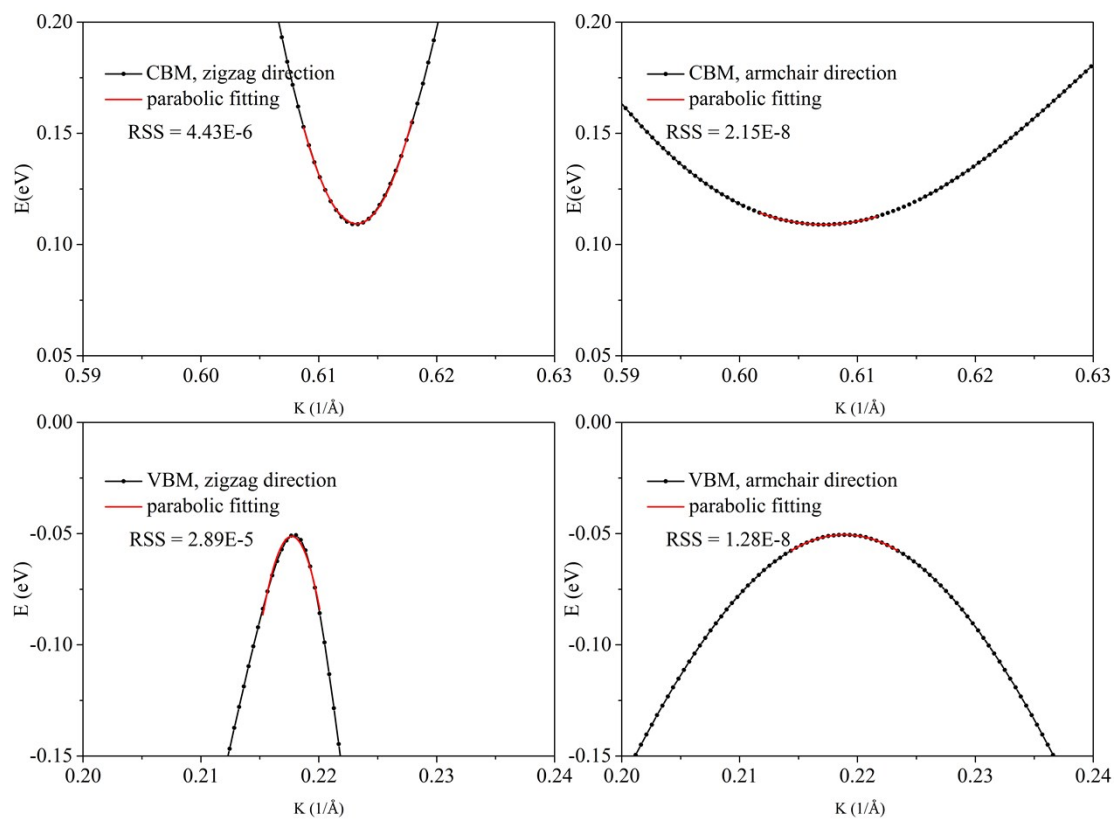

(b)

**Figure S2.** Parabolic fitting for (a) selenene and (b) tellurene calculated with PBE-SOC. 16~20 points around the minimum (maximum) point is used to fit. RSS: Residual Sum of Squares
